# Supplementary material for: Status of the Archaeal and Bacterial Census: an Update
Source: PubMed Central journal article supplement (PMC4895100; doi:10.1128/mbio.00201-16), 2016-05-17
Supplement: mbo003162817st1.pdf [file mbo003162817st1.pdf]

**Supplemental Table 1. Description of environmental categories and the criteria used to assign sequences to each category.**

| Coarse           | Fine                 | Description                                                                                                                                                                                                         |
|------------------|----------------------|---------------------------------------------------------------------------------------------------------------------------------------------------------------------------------------------------------------------|
| Aerosol          |                      | Any sample taken from an atmosphere or aerosolized environment. Very rarely used.                                                                                                                                   |
| Aquatic          | Brackish             | Any sample taken from a brackish or low-salt environment. Includes estuaries, brackish lakes, and other interfaces between salt and freshwater.                                                                     |
|                  | Brackish sediment    | A sample taken from soil or sediment layer of a body of water classified as Aquatic Brackish. Often used on brackish mud flats.                                                                                     |
|                  | Freshwater           | Any freshwater sample. Includes rivers, ponds, aquifers, drinking water, and aquaculture habitats.                                                                                                                  |
|                  | Freshwater sediment  | Any sample taken from the soil or sediment from any body of water that would be classified as Aquatic Freshwater.                                                                                                   |
|                  | Marine               | Any water sample from the ocean or any other saline aquatic source of water, including salt pans and salt lakes.                                                                                                    |
|                  | Marine sediment      | Any sample taken from the soil or sediment from any body of water that would be classified as Aquatic Marine.                                                                                                       |
|                  | Hydrothermal vent    | A sample taken from a hot spring or undersea vent, and any associated sediments.                                                                                                                                    |
|                  | Ice                  | Icy samples. Includes glaciers, icebergs, and snowmelt.                                                                                                                                                             |
| Built            | Other                | A sample that eludes classification or had no specification.                                                                                                                                                        |
|                  | Digesters            | A digester or other bioprocessing facility. Includes digesters, sewage treatment plants, microbial fuel production facilities, enrichment cultures that were found to degrade a certain compound, and septic tanks. |
|                  | Food-associated      | A sample taken from human food or drink.                                                                                                                                                                            |
|                  | Industrial/mining    | A sample taken from an industrial process or a mine (active or abandoned). Includes factories, mines, and chemical plants.                                                                                          |
|                  | Pollution associated | Any sample found in an environment found with a pollutant or contaminant such as oil spills and environmental industrial waste. Much overlap with industrial.                                                       |
| Plant associated | Other                | A human built environment that eludes any above classification. Many clinical surfaces.                                                                                                                             |
|                  | Plant root           | Any sample taken from the root area of the plant. Includes rhizospheric soil and nodules.                                                                                                                           |
|                  | Plant surface        | Any sample taken from the leaf, stem, or fruit surface of a plant. Used rarely because it usually isn't specified.                                                                                                  |
| Soil             | Other                | Any plant-associated sample that doesn't fit above classifications.                                                                                                                                                 |
|                  | Agricultural soil    | Any sample taken from farmland or garden soil. Sometimes overlapped with PR, but usually this category was used when the soil was not taken from rhizosphere.                                                       |
|                  | Desert soil          | Any sample from arid or desert soil or sand. Includes desert rocks.                                                                                                                                                 |
|                  | Permafrost           | Any sample taken from permafrost soil or from subglacial rock or soil.                                                                                                                                              |
| Host-associated  | Other                | Any sample that didn't fit above categories. Includes caves. Commonly used.                                                                                                                                         |
|                  | Vertebrate           | Any vertebrate-associated sample. Body parts and animal fluids were often assumed to be human when not specified and thus put into this category.                                                                   |
|                  | Arthropod            | Any arthropod-associated sample. Includes larvae and feces.                                                                                                                                                         |
|                  | Other invertebrate   | Any invertebrate animal that wasn't arthropod or vertebrate.                                                                                                                                                        |
| Other            | Other                | Any unspecified sample that could not be reasonably assumed to be human.                                                                                                                                            |
|                  | Other                | Any sample that truly evaded all classification. The weirdest of the weird reside here.                                                                                                                             |
