# Supplementary material for: Status of the Archaeal and Bacterial Census: an Update
Source: PubMed Central journal article supplement (PMC4895100; doi:10.1128/mbio.00201-16), 2016-05-17
Supplement: mbo003162817st2.pdf [file mbo003162817st2.pdf]

**Supplementary Table 2. Frequency that each bacterial phylum was sequenced before and after 2006.**

| Phylum                        | <2006 and Before | After 2006 | Total   | Ratio of Ratios |
|-------------------------------|------------------|------------|---------|-----------------|
| Firmicutes                    | 28567            | 448414     | 476981  | 1.17            |
| Proteobacteria                | 34904            | 377724     | 412628  | 0.81            |
| Actinobacteria                | 9524             | 210455     | 219979  | 1.65            |
| Bacteroidetes                 | 13869            | 135811     | 149680  | 0.73            |
| Chloroflexi                   | 1001             | 22337      | 23338   | 1.67            |
| Cyanobacteria                 | 1401             | 16781      | 18182   | 0.9             |
| Acidobacteria                 | 1168             | 14707      | 15875   | 0.94            |
| Planctomycetes                | 822              | 14719      | 15541   | 1.34            |
| Spirochaetae                  | 1385             | 10406      | 11791   | 0.56            |
| Fusobacteria                  | 384              | 9074       | 9458    | 1.77            |
| Verrucomicrobia               | 524              | 8084       | 8608    | 1.15            |
| Tenericutes                   | 1088             | 4618       | 5706    | 0.32            |
| Lentisphaerae                 | 117              | 3488       | 3605    | 2.23            |
| Nitrospirae                   | 324              | 2665       | 2989    | 0.62            |
| Gemmatimonadetes              | 185              | 2725       | 2910    | 1.1             |
| Saccharibacteria              | 120              | 2456       | 2576    | 1.53            |
| Fibrobacteres                 | 127              | 2413       | 2540    | 1.42            |
| Atribacteria                  | 38               | 2481       | 2519    | 4.89            |
| Deinococcus-Thermus           | 357              | 1795       | 2152    | 0.38            |
| Synergistetes                 | 118              | 1709       | 1827    | 1.08            |
| Aminicenantes                 | 39               | 1692       | 1731    | 3.25            |
| Deferribacteres               | 58               | 1490       | 1548    | 1.92            |
| Chlorobi                      | 155              | 1260       | 1415    | 0.61            |
| Armatimonadetes               | 93               | 1319       | 1412    | 1.06            |
| Marinimicrobia (SAR406 clade) | 55               | 1260       | 1315    | 1.71            |
| Parcubacteria                 | 121              | 1169       | 1290    | 0.72            |
| Kazan-3B-09                   | 12               | 1224       | 1236    | 7.63            |
| Gracilibacteria               | 33               | 1092       | 1125    | 2.48            |
| Latescibacteria               | 47               | 950        | 997     | 1.51            |
| Hydrogenedentes               | 33               | 922        | 955     | 2.09            |
| Aquificae                     | 592              | 321        | 913     | 0.04            |
| Thermotogae                   | 121              | 684        | 805     | 0.42            |
| TM6                           | 41               | 752        | 793     | 1.37            |
| Microgenomates                | 141              | 617        | 758     | 0.33            |
| Chlamydiae                    | 169              | 552        | 721     | 0.24            |
| Omnitrophica                  | 16               | 617        | 633     | 2.89            |
| TA06                          | 28               | 546        | 574     | 1.46            |
| OP3                           | 36               | 536        | 572     | 1.11            |
| Elusimicrobia                 | 61               | 396        | 457     | 0.49            |
| Cloacimonetes                 | 135              | 307        | 442     | 0.17            |
| Acetothermia                  | 19               | 280        | 299     | 1.1             |
| Aerophobetes                  | 15               | 262        | 277     | 1.31            |
| Caldiserica                   | 23               | 229        | 252     | 0.75            |
| Hyd24-12                      | 8                | 234        | 242     | 2.19            |
| WS6                           | 36               | 199        | 235     | 0.41            |
| SR1                           | 4                | 186        | 190     | 3.48            |
| SHA-109                       | 7                | 168        | 175     | 1.8             |
| PAUC34f                       | 6                | 164        | 170     | 2.05            |
| WD272                         | 14               | 125        | 139     | 0.67            |
| Thermodesulfobacteria         | 73               | 45         | 118     | 0.05            |
| SM2F11                        | 5                | 102        | 107     | 1.53            |
| WCHB1-60                      | 9                | 61         | 70      | 0.51            |
| JL-ETNP-Z39                   | 2                | 43         | 45      | 1.61            |
| CKC4                          | 0                | 41         | 41      | NA              |
| LCP-89                        | 4                | 28         | 32      | 0.52            |
| GOUTA4                        | 5                | 26         | 31      | 0.39            |
| Dictyoglomi                   | 4                | 24         | 28      | 0.45            |
| GAL08                         | 4                | 13         | 17      | 0.24            |
| SBYG-2791                     | 0                | 16         | 16      | NA              |
| Chrysiogenetes                | 2                | 11         | 13      | 0.41            |
| LD1-PA38                      | 3                | 6          | 9       | 0.15            |
| OC31                          | 0                | 7          | 7       | NA              |
| RsaHF231                      | 1                | 6          | 7       | 0.45            |
| Calescamantes                 | 2                | 1          | 3       | 0.04            |
| S2R-29                        | 0                | 2          | 2       | NA              |
| Total                         | 98255            | 1312847    | 1411102 | 1.00            |
