# Supplementary material for: Status of the Archaeal and Bacterial Census: an Update
Source: PubMed Central journal article supplement (PMC4895100; doi:10.1128/mbio.00201-16), 2016-05-17
Supplement: mbo003162817st3.pdf [file mbo003162817st3.pdf]

**Supplementary Table 3. Frequency that each archaeal phylum was sequenced before and after 2006.**

| <b>Phylum</b>                      | <b>&lt;2006 and Before</b> | <b>After 2006</b> | <b>Total</b> | <b>Ratio of Ratios</b> |
|------------------------------------|----------------------------|-------------------|--------------|------------------------|
| Euryarchaeota                      | 3687                       | 24719             | 28406        | 0.84                   |
| Thaumarchaeota                     | 1032                       | 16850             | 17882        | 2.04                   |
| Miscellaneous Crenarchaeotic Group | 334                        | 3404              | 3738         | 1.27                   |
| Crenarchaeota                      | 537                        | 643               | 1180         | 0.15                   |
| Woesearchaeota                     | 114                        | 504               | 618          | 0.55                   |
| Aenigmarchaeota                    | 62                         | 277               | 339          | 0.56                   |
| Aigarchaeota                       | 79                         | 223               | 302          | 0.35                   |
| Marine Hydrothermal Vent Group     | 7                          | 260               | 267          | 4.63                   |
| Korarchaeota                       | 39                         | 175               | 214          | 0.56                   |
| Ancient Archaeal Group             | 0                          | 191               | 191          | NA                     |
| Nanoarchaeota                      | 3                          | 135               | 138          | 5.61                   |
| Miscellaneous Euryarchaeotic Group | 7                          | 78                | 85           | 1.39                   |
| Nanohaloarchaeota                  | 2                          | 77                | 79           | 4.8                    |
| Diapherotrites                     | 16                         | 23                | 39           | 0.18                   |
| SM1K20                             | 4                          | 29                | 33           | 0.9                    |
| Marine Hydrothermal Vent Group 1   | 4                          | 9                 | 13           | 0.28                   |
| Parvarchaeota                      | 1                          | 8                 | 9            | 1                      |
| Marine Hydrothermal Vent Group 2   | 3                          | 0                 | 3            | 0                      |
| Unclassified                       | 3                          | 0                 | 3            | 0                      |
| TVG8AR30                           | 0                          | 2                 | 2            | NA                     |
| Total                              | 5934                       | 47607             | 53541        | 1.00                   |
