# Supplementary material for: Status of the Archaeal and Bacterial Census: an Update
Source: PubMed Central journal article supplement (PMC4895100; doi:10.1128/mbio.00201-16), 2016-05-17
Supplement: mbo003162817st5.pdf [file mbo003162817st5.pdf]

Supplementary Table 5. Frequency that each archaeal phylum was found across each of the environmental categories.

|                                    | Aerosol | Brackish | Brackish sediment | Freshwater | Freshwater sediment | Marine | Marine sediment | Hydrothermal vent | Ice   | Aquatic other | Digesters | Food-associated | Industrial/mining | Pollution associated | Built other | Plant root | Plant surface | Plant other | Agricultural soil | Desert soil | Permafrost | Other soils | Vertebrate | Arthropod | Other invertebrate | Other zoological | Other | Total |
|------------------------------------|---------|----------|-------------------|------------|---------------------|--------|-----------------|-------------------|-------|---------------|-----------|-----------------|-------------------|----------------------|-------------|------------|---------------|-------------|-------------------|-------------|------------|-------------|------------|-----------|--------------------|------------------|-------|-------|
| Euryarchaeota                      | 2       | 488      | 138               | 598        | 726                 | 1295   | 6               | 4099              | 5409  | 535           | 3688      | 117             | 1026              | 378                  | 511         | 22         | 33            | 0           | 78                | 3           | 5261       | 1026        | 646        | 87        | 21                 | 53               | 71    | 28410 |
| Thaumarchaeota                     | 0       | 687      | 274               | 546        | 280                 | 805    | 36              | 6666              | 5505  | 146           | 843       | 0               | 156               | 36                   | 173         | 0          | 108           | 0           | 149               | 35          | 126        | 752         | 116        | 0         | 42                 | 0                | 129   | 17883 |
| Miscellaneous Crenarchaeotic Group | 0       | 92       | 107               | 101        | 224                 | 357    | 0               | 102               | 2117  | 36            | 148       | 0               | 43                | 24                   | 22          | 0          | 3             | 0           | 9                 | 0           | 2          | 272         | 55         | 0         | 4                  | 0                | 0     | 3738  |
| Crenarchaeota                      | 0       | 0        | 1                 | 24         | 15                  | 803    | 0               | 11                | 17    | 2             | 72        | 0               | 10                | 2                    | 1           | 0          | 0             | 0           | 0                 | 0           | 20         | 16          | 0          | 0         | 1                  | 0                | 1180  |       |
| Woesearchaeota                     | 0       | 61       | 0                 | 75         | 9                   | 56     | 0               | 19                | 365   | 3             | 5         | 0               | 4                 | 0                    | 5           | 0          | 2             | 0           | 0                 | 0           | 1          | 6           | 0          | 0         | 0                  | 0                | 618   |       |
| Aenigmarchaeota                    | 0       | 8        | 2                 | 24         | 59                  | 70     | 0               | 21                | 100   | 25            | 1         | 0               | 0                 | 0                    | 0           | 0          | 0             | 0           | 1                 | 0           | 0          | 20          | 0          | 0         | 0                  | 0                | 339   |       |
| Aigarchaeota                       | 0       | 7        | 0                 | 12         | 0                   | 201    | 0               | 2                 | 20    | 4             | 1         | 0               | 4                 | 4                    | 0           | 0          | 0             | 0           | 0                 | 0           | 2          | 13          | 0          | 0         | 0                  | 0                | 302   |       |
| Marine Hydrothermal Vent Group     | 0       | 6        | 3                 | 2          | 3                   | 13     | 0               | 5                 | 218   | 5             | 0         | 0               | 0                 | 0                    | 0           | 0          | 0             | 0           | 0                 | 0           | 3          | 8           | 0          | 0         | 0                  | 0                | 267   |       |
| Korarchaeota                       | 0       | 0        | 0                 | 2          | 0                   | 159    | 0               | 3                 | 21    | 0             | 6         | 0               | 0                 | 0                    | 0           | 0          | 0             | 0           | 8                 | 1           | 0          | 3           | 2          | 0         | 0                  | 0                | 214   |       |
| Ancient Archaeal Group             | 0       | 0        | 0                 | 0          | 0                   | 0      | 0               | 0                 | 191   | 0             | 0         | 0               | 0                 | 0                    | 0           | 0          | 0             | 0           | 0                 | 0           | 0          | 0           | 0          | 0         | 0                  | 0                | 191   |       |
| Nanoarchaeota                      | 0       | 0        | 0                 | 132        | 0                   | 5      | 0               | 0                 | 0     | 0             | 0         | 0               | 0                 | 0                    | 0           | 0          | 0             | 0           | 0                 | 0           | 0          | 0           | 0          | 0         | 0                  | 0                | 138   |       |
| Miscellaneous Euryarchaeotic Group | 0       | 0        | 0                 | 6          | 4                   | 10     | 0               | 1                 | 61    | 0             | 0         | 0               | 0                 | 0                    | 1           | 0          | 0             | 0           | 0                 | 0           | 1          | 0           | 0          | 0         | 0                  | 0                | 85    |       |
| Nanohaloarchaeota                  | 0       | 5        | 0                 | 11         | 0                   | 0      | 0               | 48                | 2     | 12            | 0         | 0               | 0                 | 0                    | 0           | 0          | 0             | 0           | 0                 | 0           | 0          | 0           | 0          | 0         | 0                  | 0                | 79    |       |
| Diapherotrites                     | 0       | 13       | 0                 | 1          | 2                   | 4      | 0               | 3                 | 6     | 1             | 0         | 0               | 0                 | 0                    | 0           | 0          | 0             | 0           | 0                 | 0           | 7          | 0           | 0          | 0         | 0                  | 0                | 39    |       |
| SM1K20                             | 0       | 1        | 0                 | 6          | 2                   | 6      | 0               | 0                 | 14    | 3             | 0         | 0               | 0                 | 0                    | 0           | 0          | 0             | 0           | 0                 | 0           | 0          | 0           | 0          | 0         | 0                  | 0                | 33    |       |
| Marine Hydrothermal Vent Group 1   | 0       | 0        | 0                 | 0          | 0                   | 10     | 0               | 2                 | 0     | 0             | 0         | 0               | 0                 | 0                    | 0           | 0          | 0             | 0           | 0                 | 0           | 0          | 0           | 0          | 0         | 0                  | 0                | 13    |       |
| Parvarchaeota                      | 0       | 0        | 0                 | 0          | 0                   | 0      | 0               | 1                 | 3     | 0             | 0         | 0               | 2                 | 0                    | 3           | 0          | 0             | 0           | 0                 | 0           | 0          | 0           | 0          | 0         | 0                  | 0                | 9     |       |
| Marine Hydrothermal Vent Group 2   | 0       | 0        | 0                 | 0          | 0                   | 0      | 0               | 0                 | 0     | 0             | 0         | 0               | 0                 | 0                    | 0           | 0          | 0             | 0           | 0                 | 0           | 0          | 0           | 0          | 0         | 0                  | 0                | 3     |       |
| Unclassified                       | 0       | 0        | 0                 | 0          | 0                   | 1      | 0               | 0                 | 0     | 0             | 0         | 0               | 0                 | 0                    | 0           | 0          | 0             | 0           | 0                 | 0           | 0          | 0           | 0          | 0         | 0                  | 0                | 3     |       |
| TVGBAR30                           | 0       | 0        | 0                 | 0          | 0                   | 2      | 0               | 0                 | 0     | 0             | 0         | 0               | 0                 | 0                    | 0           | 0          | 0             | 0           | 0                 | 0           | 0          | 0           | 0          | 0         | 0                  | 0                | 2     |       |
| Total                              | 2       | 1368     | 525               | 1540       | 1324                | 3797   | 42              | 10983             | 14049 | 772           | 4764      | 117             | 1245              | 444                  | 716         | 22         | 146           | 0           | 245               | 39          | 5389       | 2087        | 882        | 87        | 67                 | 54               | 200   | 53546 |
