# Supplementary material for: Status of the Archaeal and Bacterial Census: an Update
Source: PubMed Central journal article supplement (PMC4895100; doi:10.1128/mbio.00201-16), 2016-05-17
Supplement: mbo003162817st6.pdf [file mbo003162817st6.pdf]

**Supplementary Table 6. Frequency that each bacterial sequence or OTU was retrieved by cultivation or by culture-independent methods.**

| Phylum                | Sequences |            |         | OTUs     |            |        |
|-----------------------|-----------|------------|---------|----------|------------|--------|
|                       | Cultured  | Uncultured | Total   | Cultured | Uncultured | Total  |
| Proteobacteria        | 119742    | 292954     | 412696  | 9629     | 25152      | 34781  |
| Firmicutes            | 84752     | 392236     | 476988  | 3073     | 29674      | 32747  |
| Bacteroidetes         | 9744      | 139939     | 149683  | 2431     | 11146      | 13577  |
| Actinobacteria        | 41122     | 178863     | 219985  | 2913     | 5222       | 8135   |
| Planctomycetes        | 539       | 15003      | 15542   | 165      | 5134       | 5299   |
| Acidobacteria         | 224       | 15657      | 15881   | 121      | 4571       | 4692   |
| Chloroflexi           | 197       | 23143      | 23340   | 68       | 2964       | 3032   |
| Verrucomicrobia       | 177       | 8431       | 8608    | 99       | 1396       | 1495   |
| Cyanobacteria         | 3541      | 14641      | 18182   | 454      | 663        | 1117   |
| Lentisphaerae         | 18        | 3587       | 3605    | 11       | 984        | 995    |
| Fibrobacteres         | 62        | 2478       | 2540    | 34       | 784        | 818    |
| Parcubacteria         | 2         | 1289       | 1291    | 2        | 676        | 678    |
| Saccharibacteria      | 10        | 2566       | 2576    | 8        | 621        | 629    |
| Armatimonadetes       | 10        | 1403       | 1413    | 6        | 545        | 551    |
| Tenericutes           | 2182      | 3552       | 5734    | 210      | 275        | 485    |
| Spirochaetae          | 2105      | 9687       | 11792   | 145      | 339        | 484    |
| Microgenomates        | 0         | 758        | 758     | 0        | 468        | 468    |
| Hydrogenedentes       | 5         | 950        | 955     | 2        | 441        | 443    |
| TM6                   | 5         | 788        | 793     | 3        | 436        | 439    |
| Deinococcus-Thermus   | 554       | 1598       | 2152    | 122      | 310        | 432    |
| Gemmatimonadetes      | 23        | 2889       | 2912    | 12       | 394        | 406    |
| Latescibacteria       | 1         | 997        | 998     | 1        | 380        | 381    |
| Gracilibacteria       | 3         | 1123       | 1126    | 3        | 376        | 379    |
| Chlorobi              | 83        | 1332       | 1415    | 29       | 349        | 378    |
| Fusobacteria          | 534       | 8924       | 9458    | 69       | 299        | 368    |
| Marinimicrobia        | 8         | 1307       | 1315    | 3        | 322        | 325    |
| OP3                   | 0         | 573        | 573     | 0        | 321        | 321    |
| Aminicenantes         | 0         | 1731       | 1731    | 0        | 319        | 319    |
| TA06                  | 0         | 574        | 574     | 0        | 287        | 287    |
| Atribacteria          | 4         | 2515       | 2519    | 4        | 218        | 222    |
| Nitrospirae           | 112       | 2878       | 2990    | 35       | 187        | 222    |
| Deferribacteres       | 44        | 1504       | 1548    | 21       | 195        | 216    |
| Kazan-3B-09           | 0         | 1236       | 1236    | 0        | 188        | 188    |
| WS6                   | 0         | 235        | 235     | 0        | 146        | 146    |
| Elusimicrobia         | 4         | 453        | 457     | 3        | 143        | 146    |
| Synergistetes         | 103       | 1724       | 1827    | 30       | 115        | 145    |
| Cloacimonetes         | 2         | 440        | 442     | 1        | 134        | 135    |
| Acetothermia          | 0         | 299        | 299     | 0        | 133        | 133    |
| Caldiserica           | 4         | 248        | 252     | 2        | 120        | 122    |
| SHA-109               | 0         | 175        | 175     | 0        | 110        | 110    |
| Hyd24-12              | 0         | 242        | 242     | 0        | 103        | 103    |
| Aerophobetes          | 1         | 276        | 277     | 1        | 96         | 97     |
| Thermotogae           | 156       | 649        | 805     | 41       | 56         | 97     |
| PAUC34f               | 1         | 169        | 170     | 1        | 94         | 95     |
| Aquificae             | 211       | 702        | 913     | 50       | 43         | 93     |
| SR1                   | 0         | 190        | 190     | 0        | 83         | 83     |
| Omnitrophica          | 0         | 633        | 633     | 0        | 83         | 83     |
| Chlamydiae            | 536       | 185        | 721     | 52       | 29         | 81     |
| WD272                 | 0         | 140        | 140     | 0        | 73         | 73     |
| SM2F11                | 0         | 107        | 107     | 0        | 72         | 72     |
| WCHB1-60              | 0         | 70         | 70      | 0        | 58         | 58     |
| JL-ETNP-Z39           | 0         | 45         | 45      | 0        | 37         | 37     |
| Thermodesulfobacteria | 21        | 97         | 118     | 8        | 28         | 36     |
| GOUTA4                | 0         | 31         | 31      | 0        | 27         | 27     |
| LCP-89                | 0         | 32         | 32      | 0        | 25         | 25     |
| CKC4                  | 2         | 40         | 42      | 2        | 18         | 20     |
| Dictyoglomi           | 11        | 17         | 28      | 2        | 12         | 14     |
| GAL08                 | 0         | 17         | 17      | 0        | 11         | 11     |
| LD1-PA38              | 0         | 9          | 9       | 0        | 8          | 8      |
| OC31                  | 0         | 7          | 7       | 0        | 6          | 6      |
| SBYG-2791             | 0         | 16         | 16      | 0        | 6          | 6      |
| RsaHF231              | 0         | 7          | 7       | 0        | 5          | 5      |
| Chrysiogenetes        | 12        | 1          | 13      | 4        | 0          | 4      |
| Calescamantes         | 0         | 3          | 3       | 0        | 3          | 3      |
| S2R-29                | 0         | 2          | 2       | 0        | 2          | 2      |
| Total                 | 266867    | 1144367    | 1411234 | 19870    | 97515      | 117385 |
