# Supplementary material for: Status of the Archaeal and Bacterial Census: an Update
Source: PubMed Central journal article supplement (PMC4895100; doi:10.1128/mbio.00201-16), 2016-05-17
Supplement: mbo003162817st7.pdf [file mbo003162817st7.pdf]

**Supplementary Table 7. Frequency that each archaeal sequence or OTU was retrieved by cultivation or by culture-independent methods.**

| Phylum                             | Sequences   |              |              | OTUs       |             |             |
|------------------------------------|-------------|--------------|--------------|------------|-------------|-------------|
|                                    | Cultured    | Uncultured   | Total        | Cultured   | Uncultured  | Total       |
| Euryarchaeota                      | 3352        | 25058        | 28410        | 522        | 2404        | 2926        |
| Thaumarchaeota                     | 46          | 17837        | 17883        | 25         | 896         | 921         |
| Miscellaneous Crenarchaeotic Group | 0           | 3738         | 3738         | 0          | 355         | 355         |
| Crenarchaeota                      | 215         | 965          | 1180         | 49         | 26          | 75          |
| Woesearchaeota                     | 0           | 618          | 618          | 0          | 70          | 70          |
| Aenigmarchaeota                    | 0           | 339          | 339          | 0          | 51          | 51          |
| Korarchaeota                       | 2           | 212          | 214          | 2          | 35          | 37          |
| Aigarchaeota                       | 0           | 302          | 302          | 0          | 31          | 31          |
| Nanoarchaeota                      | 1           | 137          | 138          | 1          | 24          | 25          |
| Marine Hydrothermal Vent Group     | 0           | 267          | 267          | 0          | 22          | 22          |
| Ancient Archaeal Group             | 0           | 191          | 191          | 0          | 15          | 15          |
| Nanohaloarchaeota                  | 2           | 77           | 79           | 2          | 8           | 10          |
| Diapherotrites                     | 0           | 39           | 39           | 0          | 8           | 8           |
| Miscellaneous Euryarchaeotic Group | 0           | 85           | 85           | 0          | 8           | 8           |
| SM1K20                             | 0           | 33           | 33           | 0          | 7           | 7           |
| Marine Hydrothermal Vent Group 1   | 0           | 13           | 13           | 0          | 5           | 5           |
| Marine Hydrothermal Vent Group 2   | 0           | 3            | 3            | 0          | 2           | 2           |
| Parvarchaeota                      | 0           | 9            | 9            | 0          | 2           | 2           |
| TVG8AR30                           | 0           | 2            | 2            | 0          | 2           | 2           |
| Unclassified                       | 0           | 3            | 3            | 0          | 2           | 2           |
| <b>Total</b>                       | <b>3618</b> | <b>49928</b> | <b>53546</b> | <b>601</b> | <b>3973</b> | <b>4574</b> |
