# Supplementary material for: Status of the Archaeal and Bacterial Census: an Update
Source: mBio. 2016 May 17;7(3):e00201-16. doi: 10.1128/mBio.00201-16 (PMC4895100; doi:10.1128/mBio.00201-16)
Supplement: Table S4 — Frequency that each bacterial phylum was found in each of the environmental categories. [file mbo003162817st4.pdf]

Supplementary Table 4. Frequency that each bacterial phylum was found across each of the environmental categories.

|                       | Aerosol | Brackish | Brackish sediment | Freshwater | Freshwater sediment | Marine | Marine sediment | Hydrothermal vent | Ice  | Aquatic other | Digesters | Food-associated | Industrial/mining | Pollution associated | Built other | Plant root | Plant surface | Plant other | Agricultural soil | Desert soil | Permafrost | Other soils | Vertebrate | Arthropod | Other invertebrate | Other host-associated | Other | Total  |
|-----------------------|---------|----------|-------------------|------------|---------------------|--------|-----------------|-------------------|------|---------------|-----------|-----------------|-------------------|----------------------|-------------|------------|---------------|-------------|-------------------|-------------|------------|-------------|------------|-----------|--------------------|-----------------------|-------|--------|
| Firmicutes            | 939     | 88       | 69                | 1430       | 956                 | 5000   | 2184            | 1459              | 184  | 1052          | 7886      | 7919            | 2556              | 3939                 | 2144        | 3290       | 929           | 3399        | 2616              | 614         | 289        | 9302        | 363435     | 2148      | 678                | 2085                  | 3179  | 476988 |
| Proteobacteria        | 1921    | 705      | 210               | 11422      | 3405                | 53191  | 11209           | 5515              | 1151 | 4673          | 11076     | 3329            | 9115              | 18649                | 4293        | 11447      | 2668          | 3434        | 3765              | 570         | 698        | 21436       | 133674     | 6384      | 4209               | 7407                  | 10038 | 412696 |
| Actinobacteria        | 388     | 31       | 8                 | 2815       | 454                 | 3161   | 2894            | 172               | 257  | 619           | 842       | 240             | 904               | 6226                 | 1110        | 2454       | 567           | 1016        | 923               | 701         | 447        | 10720       | 159964     | 940       | 492                | 269                   | 1692  | 219985 |
| Bacteroidetes         | 116     | 132      | 39                | 2328       | 445                 | 21069  | 1943            | 684               | 365  | 752           | 4511      | 170             | 1062              | 4289                 | 333         | 693        | 186           | 1157        | 343               | 188         | 110        | 3839        | 94839      | 1147      | 708                | 323                   | 1596  | 149683 |
| Chloroflexi           | 7       | 14       | 6                 | 220        | 268                 | 11894  | 1712            | 295               | 3    | 153           | 3504      | 11              | 386               | 894                  | 124         | 165        | 60            | 97          | 187               | 283         | 21         | 1586        | 314        | 11        | 331                | 16                    | 291   | 23340  |
| Cyanobacteria         | 20      | 28       | 1                 | 1098       | 28                  | 9100   | 216             | 325               | 33   | 237           | 66        | 38              | 112               | 75                   | 72          | 22         | 320           | 44          | 82                | 342         | 147        | 992         | 652        | 28        | 198                | 30                    | 1126  | 18182  |
| Acidobacteria         | 9       | 6        | 19                | 295        | 241                 | 518    | 648             | 174               | 12   | 181           | 504       | 15              | 506               | 1215                 | 97          | 839        | 61            | 134         | 1563              | 106         | 108        | 7079        | 454        | 63        | 317                | 8                     | 308   | 15881  |
| Planctomycetes        | 11      | 16       | 10                | 319        | 153                 | 7516   | 1464            | 265               | 31   | 311           | 778       | 21              | 346               | 751                  | 64          | 196        | 3             | 124         | 130               | 36          | 20         | 1163        | 496        | 95        | 154                | 81                    | 302   | 15542  |
| Spirochaetae          | 4       | 7        | 3                 | 44         | 55                  | 5803   | 246             | 42                | 1    | 55            | 403       | 3               | 111               | 129                  | 18          | 2          | 0             | 3           | 1                 | 8           | 0          | 71          | 1508       | 1183      | 30                 | 10                    | 85    | 11792  |
| Fusobacteria          | 1       | 0        | 1                 | 3          | 6                   | 18     | 36              | 17                | 0    | 10            | 24        | 3               | 11                | 2                    | 20          | 0          | 0             | 0           | 0                 | 0           | 0          | 11          | 8494       | 3         | 1                  | 440                   | 15    | 9458   |
| Verrucomicrobia       | 5       | 7        | 1                 | 328        | 77                  | 3337   | 107             | 99                | 17   | 93            | 95        | 0               | 117               | 397                  | 35          | 200        | 2             | 88          | 66                | 37          | 28         | 731         | 2207       | 65        | 82                 | 71                    | 100   | 8608   |
| Tenericutes           | 0       | 1        | 1                 | 22         | 4                   | 31     | 12              | 8                 | 1    | 0             | 257       | 14              | 34                | 57                   | 6           | 2          | 68            | 56          | 2                 | 0           | 0          | 21          | 2373       | 94        | 57                 | 58                    | 17    | 5734   |
| Leptisphaerae         | 0       | 7        | 3                 | 47         | 42                  | 2237   | 163             | 13                | 0    | 14            | 233       | 0               | 21                | 38                   | 6           | 0          | 0             | 11          | 1                 | 4           | 0          | 26          | 631        | 11        | 39                 | 12                    | 8     | 3605   |
| Nitrospirae           | 10      | 5        | 4                 | 262        | 91                  | 77     | 291             | 96                | 0    | 237           | 121       | 23              | 275               | 183                  | 58          | 98         | 0             | 13          | 55                | 10          | 7          | 671         | 61         | 4         | 43                 | 2                     | 108   | 2990   |
| Gemmatimonadetes      | 1       | 2        | 8                 | 42         | 43                  | 245    | 176             | 20                | 2    | 15            | 29        | 2               | 102               | 695                  | 21          | 123        | 0             | 28          | 178               | 71          | 12         | 738         | 149        | 3         | 30                 | 0                     | 71    | 2912   |
| Saccharibacteria      | 4       | 3        | 0                 | 23         | 7                   | 18     | 4               | 4                 | 6    | 22            | 80        | 3               | 43                | 374                  | 6           | 29         | 13            | 15          | 11                | 8           | 3          | 182         | 1609       | 22        | 5                  | 8                     | 24    | 2576   |
| Fibrobacteres         | 0       | 1        | 0                 | 18         | 12                  | 1429   | 30              | 2                 | 0    | 8             | 42        | 2               | 3                 | 8                    | 2           | 1          | 0             | 3           | 3                 | 1           | 0          | 17          | 199        | 721       | 12                 | 0                     | 7     | 2540   |
| Atribacteria          | 0       | 0        | 0                 | 0          | 28                  | 78     | 2222            | 21                | 0    | 0             | 85        | 0               | 31                | 16                   | 2           | 0          | 0             | 1           | 0                 | 2           | 0          | 13          | 2          | 0         | 0                  | 0                     | 3     | 2519   |
| Deinococcus-Thermus   | 14      | 1        | 1                 | 61         | 12                  | 216    | 16              | 227               | 4    | 30            | 34        | 5               | 162               | 86                   | 30          | 8          | 5             | 13          | 11                | 33          | 1          | 198         | 519        | 3         | 2                  | 2                     | 89    | 2152   |
| Synergistetes         | 1       | 0        | 0                 | 6          | 13                  | 16     | 4               | 10                | 0    | 1             | 895       | 2               | 95                | 44                   | 5           | 0          | 0             | 10          | 1                 | 0           | 0          | 18          | 560        | 59        | 0                  | 1                     | 10    | 1827   |
| Aminicantantes        | 0       | 0        | 0                 | 9          | 42                  | 1193   | 37              | 22                | 0    | 3             | 30        | 0               | 9                 | 17                   | 12          | 1          | 0             | 0           | 3                 | 1           | 0          | 38          | 0          | 0         | 7                  | 0                     | 1     | 1731   |
| Deferribacteres       | 0       | 0        | 1                 | 20         | 11                  | 1058   | 74              | 31                | 0    | 8             | 28        | 0               | 39                | 20                   | 1           | 0          | 0             | 1           | 0                 | 1           | 0          | 20          | 185        | 5         | 1                  | 0                     | 1     | 1548   |
| Chlorobi              | 7       | 21       | 1                 | 186        | 57                  | 285    | 75              | 88                | 1    | 36            | 155       | 0               | 85                | 73                   | 38          | 14         | 1             | 11          | 13                | 1           | 19         | 63          | 28         | 16        | 12                 | 0                     | 49    | 1415   |
| Armatimonadetes       | 3       | 2        | 0                 | 36         | 21                  | 424    | 72              | 38                | 2    | 17            | 107       | 4               | 41                | 74                   | 5           | 23         | 9             | 30          | 20                | 9           | 7          | 224         | 179        | 2         | 1                  | 1                     | 23    | 1413   |
| Marinimicrobia        | 0       | 1        | 0                 | 1          | 1                   | 1149   | 42              | 23                | 0    | 7             | 23        | 0               | 4                 | 8                    | 0           | 2          | 0             | 0           | 0                 | 0           | 0          | 20          | 0          | 0         | 0                  | 0                     | 23    | 1315   |
| Parcubacteria         | 0       | 5        | 0                 | 118        | 36                  | 328    | 207             | 83                | 1    | 31            | 151       | 0               | 48                | 70                   | 16          | 11         | 0             | 9           | 14                | 0           | 1          | 76          | 50         | 0         | 3                  | 0                     | 22    | 1291   |
| Kazan-3B-09           | 0       | 0        | 0                 | 1          | 2                   | 1181   | 47              | 1                 | 0    | 2             | 0         | 0               | 0                 | 1                    | 0           | 0          | 0             | 0           | 0                 | 0           | 0          | 1           | 0          | 0         | 0                  | 0                     | 0     | 1236   |
| Gracilbacteria        | 4       | 2        | 1                 | 34         | 19                  | 744    | 52              | 96                | 0    | 18            | 15        | 0               | 11                | 11                   | 4           | 1          | 0             | 4           | 0                 | 0           | 0          | 10          | 57         | 9         | 5                  | 4                     | 11    | 1126   |
| Latescibacteria       | 0       | 2        | 2                 | 16         | 40                  | 614    | 137             | 19                | 0    | 5             | 7         | 0               | 23                | 11                   | 2           | 9          | 0             | 3           | 7                 | 2           | 0          | 71          | 2          | 0         | 0                  | 0                     | 14    | 998    |
| Hydrogenedentes       | 1       | 0        | 0                 | 13         | 10                  | 640    | 70              | 15                | 0    | 12            | 62        | 0               | 10                | 35                   | 2           | 4          | 0             | 1           | 17                | 2           | 0          | 18          | 4          | 1         | 3                  | 0                     | 21    | 955    |
| Aquificae             | 0       | 0        | 0                 | 46         | 0                   | 2      | 1               | 650               | 0    | 3             | 0         | 0               | 1                 | 0                    | 0           | 0          | 0             | 0           | 0                 | 0           | 0          | 3           | 2          | 0         | 0                  | 1                     | 71    | 913    |
| Thermotogae           | 0       | 0        | 0                 | 7          | 8                   | 39     | 9               | 89                | 0    | 2             | 368       | 0               | 106               | 30                   | 2           | 2          | 0             | 7           | 1                 | 1           | 0          | 21          | 0          | 0         | 0                  | 0                     | 9     | 805    |
| TM6                   | 1       | 1        | 0                 | 27         | 11                  | 327    | 114             | 7                 | 1    | 19            | 36        | 2               | 29                | 34                   | 2           | 13         | 0             | 19          | 2                 | 0           | 1          | 75          | 19         | 0         | 3                  | 9                     | 27    | 793    |
| Microgenomates        | 1       | 1        | 0                 | 38         | 28                  | 172    | 83              | 23                | 0    | 32            | 64        | 0               | 33                | 104                  | 13          | 9          | 0             | 8           | 13                | 1           | 1          | 77          | 20         | 0         | 1                  | 1                     | 14    | 758    |
| Chlamydiae            | 0       | 0        | 0                 | 40         | 6                   | 9      | 6               | 0                 | 0    | 16            | 1         | 0               | 1                 | 1                    | 2           | 0          | 0             | 0           | 0                 | 0           | 0          | 15          | 159        | 1         | 0                  | 2                     | 8     | 721    |
| Omnitrophica          | 1       | 1        | 0                 | 42         | 9                   | 402    | 85              | 9                 | 0    | 13            | 25        | 0               | 16                | 4                    | 1           | 1          | 0             | 3           | 0                 | 0           | 1          | 6           | 6          | 0         | 3                  | 0                     | 3     | 633    |
| TA06                  | 0       | 0        | 1                 | 14         | 15                  | 206    | 152             | 24                | 0    | 8             | 114       | 0               | 6                 | 11                   | 2           | 0          | 0             | 0           | 1                 | 0           | 0          | 14          | 0          | 0         | 1                  | 0                     | 0     | 574    |
| OP3                   | 0       | 0        | 0                 | 40         | 31                  | 234    | 130             | 9                 | 0    | 18            | 15        | 0               | 18                | 16                   | 2           | 5          | 0             | 1           | 4                 | 0           | 0          | 29          | 3          | 0         | 0                  | 0                     | 9     | 573    |
| Elusimicrobia         | 0       | 1        | 0                 | 28         | 2                   | 9      | 15              | 18                | 0    | 13            | 9         | 0               | 18                | 25                   | 2           | 7          | 0             | 4           | 9                 | 1           | 1          | 57          | 47         | 179       | 0                  | 0                     | 5     | 457    |
| Cloacimonetes         | 0       | 0        | 0                 | 9          | 9                   | 6      | 3               | 1                 | 0    | 2             | 356       | 2               | 16                | 15                   | 1           | 0          | 0             | 0           | 0                 | 0           | 0          | 4           | 2          | 7         | 1                  | 0                     | 1     | 442    |
| Acetothermia          | 0       | 2        | 0                 | 56         | 7                   | 24     | 148             | 18                | 0    | 4             | 3         | 0               | 4                 | 3                    | 1           | 0          | 0             | 0           | 0                 | 5           | 0          | 4           | 0          | 0         | 0                  | 0                     | 8     | 299    |
| Aerophobetes          | 0       | 0        | 0                 | 20         | 0                   | 4      | 234             | 2                 | 0    | 1             | 0         | 2               | 1                 | 1                    | 0           | 0          | 0             | 0           | 0                 | 0           | 0          | 5           | 0          | 0         | 0                  | 0                     | 2     | 277    |
| Caldiserica           | 0       | 0        | 0                 | 2          | 0                   | 142    | 8               | 9                 | 0    | 1             | 57        | 0               | 4                 | 14                   | 1           | 0          | 0             | 3           | 0                 | 0           | 0          | 2           | 0          | 0         | 0                  | 0                     | 5     | 252    |
| Hyd24-12              | 0       | 0        | 0                 | 3          | 6                   | 203    | 14              | 6                 | 0    | 0             | 6         | 0               | 0                 | 0                    | 0           | 0          | 0             | 0           | 0                 | 0           | 0          | 1           | 0          | 0         | 1                  | 0                     | 1     | 242    |
| WS6                   | 0       | 1        | 0                 | 4          | 6                   | 94     | 44              | 6                 | 0    | 8             | 13        | 1               | 30                | 10                   | 0           | 0          | 0             | 1           | 1                 | 0           | 0          | 5           | 5          | 0         | 0                  | 0                     | 5     | 235    |
| SR1                   | 0       | 0        | 0                 | 8          | 0                   | 124    | 1               | 12                | 0    | 8             | 8         | 0               | 6                 | 2                    | 0           | 0          | 0             | 0           | 1                 | 0           | 0          | 0           | 17         | 2         | 1                  | 0                     | 0     | 190    |
| SHA-109               | 3       | 0        | 0                 | 5          | 4                   | 17     | 8               | 1                 | 0    | 0             | 13        | 1               | 9                 | 4                    | 0           | 1          | 0             | 0           | 0                 | 1           | 0          | 18          | 83         | 1         | 2                  | 1                     | 2     | 175    |
| PAUC34f               | 0       | 0        | 0                 | 2          | 0                   | 45     | 10              | 3                 | 0    | 0             | 1         | 0               | 2                 | 0                    | 0           | 0          | 0             | 0           | 0                 | 1           | 0          | 2           | 7          | 0         | 42                 | 0                     | 2     | 170    |
| WD272                 | 0       | 0        | 0                 | 2          | 2                   | 0      | 0               | 1                 | 5    | 1             | 0         | 3               | 7                 | 0                    | 0           | 4          | 0             | 0           | 0                 | 3           | 0          | 108         | 1          | 0         | 0                  | 0                     | 1     | 140    |
| Thermodesulfobacteria | 0       | 0        | 0                 | 8          | 0                   | 0      | 1               | 85                | 0    | 0             | 0         | 0               | 4                 | 1                    | 0           | 0          | 0             | 0           | 0                 | 0           | 0          | 1           | 0          | 0         | 0                  | 0                     | 0     | 118    |
| SM2F11                | 0       | 0        | 0                 | 9          | 0                   | 62     | 6               | 1                 | 0    | 0             | 3         | 0               | 0                 | 0                    | 0           | 15         | 0             | 0           | 1                 | 0           | 0          | 3           | 5          | 0         | 0                  | 0                     | 1     | 107    |
| WCHB1-60              | 0       | 0        | 0                 | 3          | 2                   | 1      | 0               | 0                 | 0    | 0             | 6         | 0               | 2                 | 16                   | 1           | 2          | 0             | 1           | 4                 | 0           | 0          | 22          | 5          | 0         | 0                  | 0                     | 2     | 70     |
| JL-ETNP-239           | 0       | 0        | 0                 | 4          | 3                   | 12     | 10              | 0                 | 0    | 0             | 0         | 0               | 0                 | 4                    | 0           | 0          | 0             | 0           | 1                 | 0           | 0          | 9           | 0          | 0         | 1                  | 0                     | 1     | 45     |
| CKC4                  | 0       | 0        | 0                 | 0          | 0                   | 0      | 1               | 0                 | 0    | 0             | 1         | 0               | 0                 | 2                    | 0           | 0          | 0             | 0           | 0                 | 0           | 0          | 17          | 1          | 0         | 13                 | 0                     | 0     | 42     |
| LCP-89                | 0       | 0        | 0                 | 1          | 2                   | 5      | 13              | 1                 | 0    | 1             | 0         | 0               | 1                 | 0                    | 0           | 0          | 0             | 0           | 0                 | 0           | 0          | 7           | 0          | 0         | 0                  | 0                     | 0     | 32     |
| GOUTA4                | 0       | 0        | 0                 | 7          | 3                   | 1      | 2               | 1                 | 0    | 1             | 2         | 0               | 2                 | 1                    | 0           | 2          | 0             | 1           | 0                 | 0           | 0          | 6           | 0          | 0         | 0                  | 0                     | 1     | 31     |
| Dictyoglomi           | 0       | 0        | 0                 | 1          | 0                   | 1      | 0               | 11                | 0    | 0             | 5         | 1               | 0                 | 0                    | 0           | 0          | 0             | 0           | 0                 | 0           | 0          | 0           | 0          | 0         | 0                  | 0                     | 0     | 28     |
| GAL08                 | 0       | 0        | 0                 | 2          | 0                   | 0      | 0               | 9                 | 0    | 0             | 0         | 0               | 4                 | 0                    | 0           | 0          | 0             | 0           | 0                 | 0           | 0          | 2           | 0          | 0         | 0                  | 0                     | 0     | 17     |
| SBYG-2791             | 0       | 0        | 0                 | 0          | 0                   | 16     | 0               | 0                 | 0    | 0             | 0         | 0               | 0                 | 0                    | 0           | 0          | 0             | 0           | 0                 | 0           | 0          | 0           | 0          | 0         | 0                  | 0                     | 0     | 0      |
| Chrysiogenetes        | 0       | 0        | 0                 | 0          | 0                   | 0      | 3               | 0                 | 0    | 0             | 0         | 1               | 0                 | 2                    | 0           | 0          | 0             | 0           | 0                 | 0           | 0          | 2           | 0          | 0         | 0                  | 0                     | 0     | 13     |
| LD1-PA38              |         |          |                   |            |                     |        |                 |                   |      |               |           |                 |                   |                      |             |            |               |             |                   |             |            |             |            |           |                    |                       |       |        |
